# Supplementary material
Source: Springer Nature journal article supplement (https://www.springermedizin.de/resource/supplementary/12889_2007_1123_MOESM1_ESM.pdf/9502502)

## Systematic Review Search Process and Results

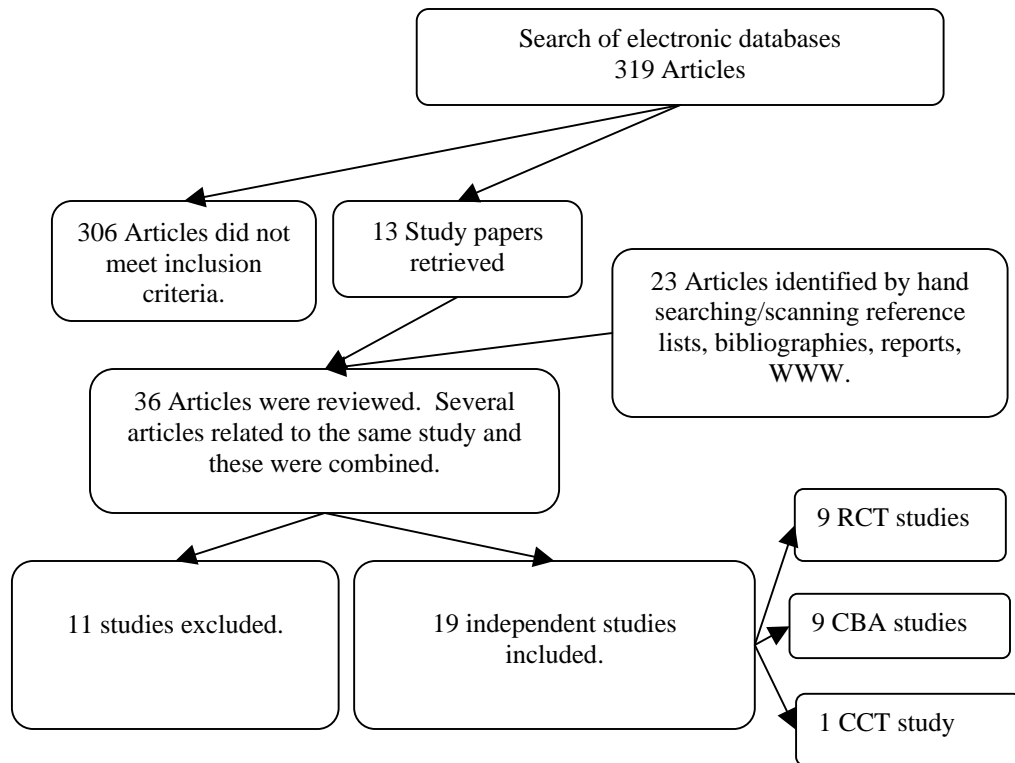

Supplement: MOESM1 [file 9502502]
